# Supplementary material for: Associations of &lt;i&gt;ORMDL1&lt;/i&gt; gene copy number variations with growth traits in four Chinese sheep breeds
Source: Copernicus journal article supplement (doi:10.5194/aab-62-571-2019), 2019-10-21
Supplement: Supplementary file [file aab-62-571-2019-supplement.pdf]

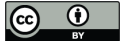

*Supplement of*

## **Associations of *ORMDL1* gene copy number variations with growth traits in four Chinese sheep breeds**

**Xiaogang Wang et al.**

*Correspondence to:* Hong Chen (chenhong1212@263.net) and Linyong Hu (xiangchou812@163.com)

The copyright of individual parts of the supplement might differ from the CC BY 4.0 License.

**Table S1** Sex and age information of four Chinese sheep

| Breed | Sex  |        | Age          |               |               |               |
|-------|------|--------|--------------|---------------|---------------|---------------|
|       | Male | Female | < 1 year old | 1~2 years old | 3~4 years old | 5~6 years old |
| CK    | 191  | 109    | 0            | 220           | 62            | 18            |
| HU    | 0    | 198    | 198          | 0             | 0             | 0             |
| STH   | 93   | 89     | 0            | 182           | 0             | 0             |
| LTH   | 17   | 37     | 0            | 54            | 0             | 0             |
